# Supplementary material
Source: PubMed Central journal article supplement (PMC6378679)
Supplement: ehp3713.s001.acco.pdf [file ehp3713.s001.acco.pdf]

**Note to readers with disabilities:** *EHP* strives to ensure that all journal content is accessible to all readers. However, some figures and Supplemental Material published in *EHP* articles may not conform to [508 standards](#) due to the complexity of the information being presented. If you need assistance accessing journal content, please contact [ehp508@niehs.nih.gov](mailto:ehp508@niehs.nih.gov). Our staff will work with you to assess and meet your accessibility needs within 3 working days.

## **Supplemental Material**

### **High Pesticide Exposure Events and Olfactory Impairment among U.S. Farmers**

Srishti Shrestha, Freya Kamel, David M. Umbach, Laura E. Beane Freeman, Stella Koutros, Michael Alavanja, Aaron Blair, Dale P. Sandler, and Honglei Chen

#### **Table of Contents**

**Supplemental methods:** Details on inverse probability weighting.

**Figure S1.** Sample selection for analysis of HPEE in relation to Olfactory impairment.

**Table S1.** AHS survey questions on high pesticide exposure events and olfactory impairment.

**Table S2.** Characteristics of full cohort taking take-home questionnaire, those who participated in the third follow-up (2013-2015), and those who did not participate in the third follow-up (2013-2015).

**Table S3.** Sensitivity analyses on HPEEs reported at enrollment (1993-1997) in relation to self-reported OI in 2013-2015 – adjusting for cumulative days of use of any pesticides and excluding Parkinson’s disease patients.

**Table S4.** Sensitivity analyses on HPEEs reported at enrollment (1993-1997) in relation to self-reported OI in 2013-2015 – excluded farmers who reported taste or smell changes at enrollment and using inverse probability weights.

**Table S5.** Adjusted odds ratios (95% CI) for self-reported olfactory impairment (OI) in 2013–2015 in association with highest exposure high pesticide exposure event (HPEE) at enrollment (1993–1997) defined by time delay between the HPEE and washing with soap and water, stratified by exposure route, relative to OI in farmers without any history of HPEE at enrollment.

## Supplemental methods: Details on inverse probability weighting

Of the 22916 participants who filled out the take-home questionnaire at enrollment, only about 61% participated in the third follow-up survey (2013-2015). Therefore, we examined associations between HPEE variables and OI using inverse probability weighting to account for the loss to follow-up in order to make inferences about all eligible farmers who returned the take-home questionnaire. Table S2 presents the characteristics of full cohort taking take-home questionnaire, those who participated in the third follow-up survey (2013-2015), and those who did not participate in 2013-2015. Participants with certain enrollment characteristics – older people (aged > 65 years), current smokers, those who did not graduate high school, those from North Carolina, those with self-reported diabetes and heart disease – were more likely not to participate in 2013-2015. Other enrollment characteristics – those who reported consuming alcohol in the past year, those reporting head injury, married applicators, and those who reported experiencing HPEE – were more likely to participate in 2013-2015. For estimation of inverse probability weights, first, we used logistic regression analyses to estimate probabilities of overall participation in 2013-2015 (a) conditional on exposure and baseline adjustment covariates (age, sex, education, smoking, state of residence, marital status, head injury, alcohol consumption, and pair-wise interaction between exposure and covariates) (the denominator of the stabilized weights); and (b) conditional only on exposure (the numerator of the stabilized weights). Finally, we estimated stabilized weights as the ratio of conditional probabilities and applied to logistic regression model examining an HPEE variable in relation to OI. We also evaluated other covariates including self-reported diabetes and heart disease at enrollment as predictors of loss-to-follow up in 2013-2015. Since the results from the analysis that used information on diabetes and heart disease were similar to that did not use such information, but because of missing data on these additional covariates, we present results based on the set of covariates that was used for confounding adjustment. The mean and standard deviation of the weights ranged from 1.00 (0.15) to 1.01 (0.22). Details on distribution of weights are presented in Table S4.

Figure S1: Sample selection for analysis of HPEE in relation to Olfactory impairment

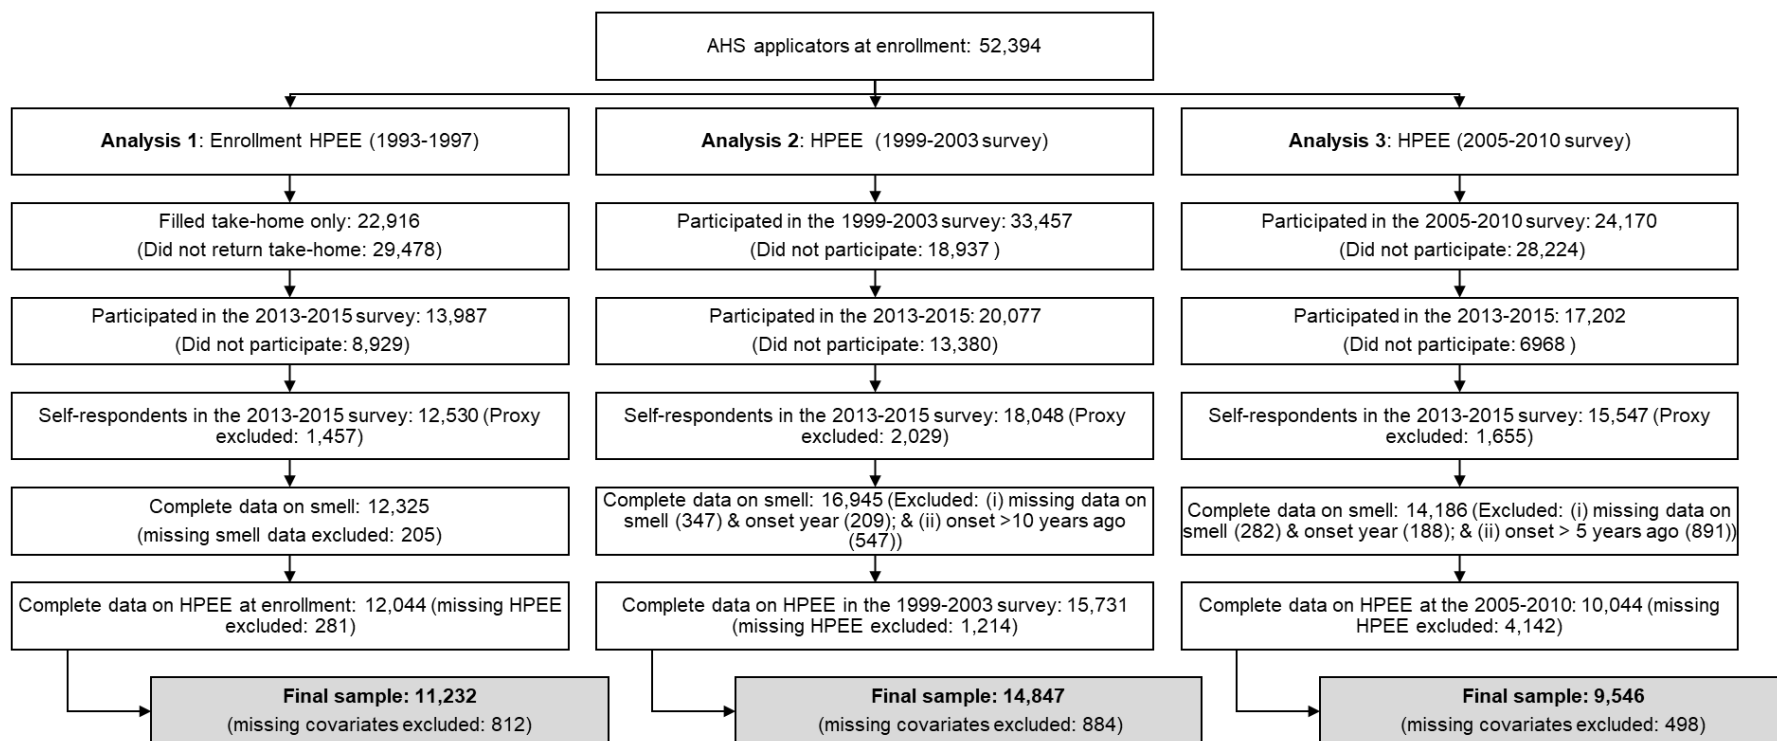

Note:

Analysis 1: Self-reported olfactory impairment (OI) in 2013-2015 in association with a history of any high pesticide exposure event (HPEE) at enrollment (1993-1997)

Analysis 2: Self-reported olfactory impairment (OI) in association with high pesticide exposure events (HPEE) that occurred between enrollment (1993-1997) and the 1999-2003 survey (for OI first noticed within 10y of the 2013-2015 survey)

Analysis 3: Self-reported olfactory impairment (OI) in association with HPEE that occurred between the 1999-2003 and 2005-2010 surveys (for OI first noticed within 5y of the 2013-2015 survey)

Table S1: AHS survey questions on high pesticide exposure events and olfactory impairment

| Questions on high pesticide exposure events asked in a take-home questionnaire at enrollment (1993-1997)                                                                                                                                                                                                                                                                                                                                                                                                           |
|--------------------------------------------------------------------------------------------------------------------------------------------------------------------------------------------------------------------------------------------------------------------------------------------------------------------------------------------------------------------------------------------------------------------------------------------------------------------------------------------------------------------|
| <p>25. Have you ever had an incident or experience while using <i>any</i> type of <i>PESTICIDE</i> which caused you <i>unusually high</i> personal exposure?</p> <p><input type="radio"/> No [GO TO QUESTION 30]      <input type="radio"/> Yes</p>                                                                                                                                                                                                                                                                |
| <p>26. What was the name of the product you were using during your highest exposure incident or experience?</p> <div style="border: 1px solid black; height: 40px; width: 100%;"></div> <p><i>(Pesticides listed in questions 10 to 24 may assist you in remembering or spelling, if needed.)</i></p>                                                                                                                                                                                                              |
| <p>27. During which decade did this pesticide incident occur?</p> <p><input type="radio"/> the 1990s<br/><input type="radio"/> the 1980s<br/><input type="radio"/> the 1970s<br/><input type="radio"/> the 1960s<br/><input type="radio"/> the 1950s<br/><input type="radio"/> the 1940s</p>                                                                                                                                                                                                                       |
| <p>28. Which part(s) of your body were exposed to the pesticide? <i>(Mark all that apply.)</i></p> <p><input type="radio"/> Head and/or face<br/><input type="radio"/> Arms<br/><input type="radio"/> Hands<br/><input type="radio"/> Chest/back/abdomen<br/><input type="radio"/> Groin area<br/><input type="radio"/> Legs<br/><input type="radio"/> Feet<br/><input type="radio"/> Lungs and respiratory tract (from breathing fumes)<br/><input type="radio"/> Digestive tract (from ingesting/swallowing)</p> |
| <p>29. How soon after this pesticide incident were you able to wash (with soap and water) your exposed body part(s)?</p> <p><input type="radio"/> Less than 30 minutes<br/><input type="radio"/> 30–59 minutes<br/><input type="radio"/> 1–3 hours<br/><input type="radio"/> 4–6 hours<br/><input type="radio"/> 7–9 hours<br/><input type="radio"/> More than 9 hours after the incident</p>                                                                                                                      |
| Questions on high pesticide exposure events asked in the first follow-up (1999-2003)                                                                                                                                                                                                                                                                                                                                                                                                                               |

38d. (During (Reference Year), did you normally use this type of glove when applying) fungicides?

1. Yes  DK  
2. No  Ref  
3. Did not use

39. Since (year of enrollment), did you have any incidents with fertilizers, herbicides or other pesticides that caused you an unusually high personal exposure?

1. Yes  REF [Go to Q41]  
0. No [Go to Q41]  DK [Go to Q41]

39a. How many of the exposure incidents have you had since (enrollment date)?

DK  REF

39b. Were any of the incidents during (last calendar year)?

1. Yes  REF [Go to Q41]  
0. No [Go to Q41]  DK [Go to Q41]

39c. Regarding the most recent incident, what was the name of the chemical you were exposed to?

SELECT ONLY ONE PESTICIDE. IF MORE THAN ONE, MAKE REMARK.

DK  REF

39d. (Regarding the most recent incident,) what parts of your body were exposed?

READ RESPONSES. MARK ALL THAT APPLY. WHEN COMPLETE PRESS ENTER.

- |                                           |                                                  |
|-------------------------------------------|--------------------------------------------------|
| 1. Head[Go to Q39e]                       | 5. Feet[Go to Q39e]                              |
| 2. Face (eyes, nose, mouth)[Go to Q39e]   | 6. Lungs (from breathing)[Go to Q39e]            |
| 3. Torso, arms, legs [Go to Q39e]         | 7. Digestive tract (from swallowing)[Go to Q39e] |
| 4. Hands[Go to Q39e]                      | 8. Something else...                             |
| <input type="checkbox"/> DK [Go to Q39e]  |                                                  |
| <input type="checkbox"/> REF [Go to Q39e] |                                                  |

39d1. What part was this?

fill in  DK  REF

39e. (Regarding the most recent incident,) what pesticide or fertilizer-related job were you doing when the exposure occurred?

- |                                          |                                                         |
|------------------------------------------|---------------------------------------------------------|
| 1. Mixing[Go to Q39g]                    | 4. Cleaning/maintenance/repair of equipment[Go to Q39g] |
| 2. Loading[Go to Q39g]                   | 5. Cleaning up a spill[Go to Q39g]                      |
| 3. Applying[Go to Q39f]                  | 6. Something else...                                    |
| <input type="checkbox"/> DK[Go to Q39g]  |                                                         |
| <input type="checkbox"/> REF[Go to Q39g] |                                                         |

39e1. What was this?

fill in  DK  REF  
[ALL RESPONSES Go to Q39g]

39f. What application method were you using?

1. broadcast from farm vehicle[Go to Q39g]
  2. hand spray gun or wand[Go to Q39g]
  3. backpack sprayer[Go to Q39g]
  4. banded sprayer[Go to Q39g]
  5. gas canister[Go to Q39g]
  6. mist blower or fogger[Go to Q39g]
  7. pre-applied to seed[Go to Q39g]
  8. greenhouse sprayer (only in any greenhouse applications)[Go to Q39g]
  9. airblast[Go to Q39g]
  10. applied dried pellets[Go to Q39g]
  11. power, knapsack or air sprayer or duster[Go to Q39g]
  12. hand treatment such as pour-ons, hand wipes, oral paste or boluses[Go to Q39g]
  13. injection[Go to Q39g]
  14. animal self-application method, like rubbing devise, dust bags, ear tabs, rope wicks or in feed additives[Go to Q39g]
  15. something else...
- DK[Go to Q39g]  
 REF[Go to Q39g]

39f1. What was this?

fill in  DK  REF

39h. How soon after the incident did you wash off or change clothes?

- 1. <30 minutes
- 2. 30-59 minutes
- 3. 1-3 hours
- 4. 4-6 hours
- 5. 7-9 hours
- 6. >9 hours after the incident
- \_\_\_DK
- \_\_\_REF

40. Did this incident result in a health care visit?

- 1. Yes \_\_\_DK [Go to Q41]
- 0. No [Go to Q41] \_\_\_REF [Go to Q41]

40a. Were you hospitalized?

- 1. Yes \_\_\_DK
- 0. No \_\_\_REF

Questions on high pesticide exposure events asked in the second follow-up (2005-2010)

**SECTION 6. HIGH PESTICIDE EXPOSURE EVENTS**

Q6.1) Since ^DSP.YearOfLastInterview, have you had any incidents or spills that resulted in an unusually high exposure to pesticides from contact with your skin, from breathing fumes, or dust, or from accidental ingestion?

- 0. NO (Skip to Section 7)
- 1. YES
- 8. REF (Skip to Section 7)
- 9. DK (Skip to Section 7)

Q6.2) Regarding the most recent incident, what was the name of the pesticide you were using?

<Display list of reported pesticide names for this applicator>

- 9999...8. REF (Skip to Q6.3)
- 9999...9. DK (Skip to Q6.3)

**BOX Q6.2: If "other" not listed, skip to Q6.3.**

Q6.2\_OS) [Regarding the most recent incident, what was the name of the pesticide you were using?]

OTHER, SPECIFY: \_\_\_\_\_

Q6.3) Did this incident result in medical treatment or hospitalization?

- 0. NO
- 1. YES
- 8. REF
- 9. DK

Questions on olfactory impairment asked in the third follow-up (2013-2015)

Do you suffer from a loss of sense of smell or a significantly decreased sense of smell?

- Yes
- No

When did you start losing your sense of smell?

- Less than 1 year ago
- 1 to 5 years ago
- 5 to 10 years ago
- More than 10 years ago
- Don't know

Table S2: Characteristics of full cohort taking take-home questionnaire, those who participated in the third follow-up (2013-2015), and those who did not participate in the third follow-up (2013-2015)

|                           | All those returning take-home questionnaire, n (%)<br>(n=22916) | Did not participate in (2013-2015), n (%)<br>(n=8929) | Participated in (2013-2015), n (%)<br>(n=13987) | Included in main analysis with complete exposure, outcome, and covariate data, n (%)<br>(n=11232) | P-value <sup>a</sup> |
|---------------------------|-----------------------------------------------------------------|-------------------------------------------------------|-------------------------------------------------|---------------------------------------------------------------------------------------------------|----------------------|
| Age at enrollment (years) |                                                                 |                                                       |                                                 |                                                                                                   | <0.0001              |
| ≤45                       | 9657 (42.1)                                                     | 3714 (41.6)                                           | 5943 (42.5)                                     | 5347 (47.6)                                                                                       |                      |
| 46-55                     | 5244 (22.9)                                                     | 1585 (17.8)                                           | 3659 (26.2)                                     | 3055 (27.2)                                                                                       |                      |
| 56-65                     | 5059 (22.1)                                                     | 1812 (20.3)                                           | 3247 (23.2)                                     | 2318 (20.6)                                                                                       |                      |
| >65                       | 2956 (12.9)                                                     | 1818 (20.4)                                           | 1138 (8.1)                                      | 512 (4.6)                                                                                         |                      |
| Sex                       |                                                                 |                                                       |                                                 |                                                                                                   | 0.5012               |
| Women                     | 556 (2.4)                                                       | 209 (2.3)                                             | 347 (2.5)                                       | 286 (2.5)                                                                                         |                      |
| Men                       | 22360 (97.6)                                                    | 8720 (97.7)                                           | 13640 (97.5)                                    | 10946 (97.5)                                                                                      |                      |
| Race <sup>c</sup>         |                                                                 |                                                       |                                                 |                                                                                                   | <0.0001              |
| Others                    | 427 (1.9)                                                       | 253 (2.9)                                             | 174 (1.3)                                       | 101 (0.9)                                                                                         |                      |
| White                     | 21980 (98.1)                                                    | 8399 (97.1)                                           | 13581 (98.7)                                    | 11122 (99.1)                                                                                      |                      |
| Missing                   | 509                                                             | 277                                                   | 232                                             | 9                                                                                                 |                      |
| State                     |                                                                 |                                                       |                                                 |                                                                                                   | <0.0001              |
| Iowa                      | 14810 (64.6)                                                    | 5065 (56.7)                                           | 9745 (69.7)                                     | 8231 (73.3)                                                                                       |                      |
| North Carolina            | 8106 (35.4)                                                     | 3864 (43.3)                                           | 4242 (30.3)                                     | 3001 (26.7)                                                                                       |                      |
| Marital status            |                                                                 |                                                       |                                                 |                                                                                                   | <0.0001              |
| Never married             | 2365 (10.4)                                                     | 1055 (11.9)                                           | 1310 (9.4)                                      | 1155 (10.3)                                                                                       |                      |
| Married/Living as married | 19220 (84.3)                                                    | 7237 (81.7)                                           | 11983 (86)                                      | 9560 (85.1)                                                                                       |                      |
| Divorced/Widowed          | 1209 (5.3)                                                      | 570 (6.4)                                             | 639 (4.6)                                       | 517 (4.6)                                                                                         |                      |
| Missing                   | 122                                                             | 67                                                    | 55                                              | 0                                                                                                 |                      |
| Education                 |                                                                 |                                                       |                                                 |                                                                                                   | <0.0001              |
| High school or lower      | 12647 (58)                                                      | 5317 (63.5)                                           | 7330 (54.5)                                     | 5798 (51.6)                                                                                       |                      |
| 1–3 years beyond high     | 5173 (23.7)                                                     | 1822 (21.8)                                           | 3351 (24.9)                                     | 2954 (26.3)                                                                                       |                      |
| College graduate or more  | 4001 (18.3)                                                     | 1236 (14.8)                                           | 2765 (20.6)                                     | 2480 (22.1)                                                                                       |                      |
| Missing                   | 1095                                                            | 554                                                   | 541                                             | 0                                                                                                 |                      |

|                                                             |              |             |              |              |         |
|-------------------------------------------------------------|--------------|-------------|--------------|--------------|---------|
| Smoking                                                     |              |             |              |              | <0.0001 |
| Never smoker                                                | 11974 (53.3) | 4255 (49.4) | 7719 (55.7)  | 6484 (57.7)  |         |
| Former smoker                                               | 7575 (33.7)  | 2980 (34.6) | 4595 (33.1)  | 3564 (31.7)  |         |
| Current smoker                                              | 2922 (13)    | 1370 (15.9) | 1552 (11.2)  | 1184 (10.5)  |         |
| Missing                                                     | 445          | 324         | 121          | 0            |         |
| Snuff use on a regular basis for six months or longer       |              |             |              |              | 0.6182  |
| No                                                          | 21950 (95.8) | 8560 (95.9) | 13390 (95.7) | 10712 (95.4) |         |
| Yes                                                         | 966 (4.2)    | 369 (4.1)   | 597 (4.3)    | 520 (4.6)    |         |
| Alcohol drinking during the past 12 months                  |              |             |              |              | <0.0001 |
| No                                                          | 7869 (36.3)  | 3289 (39.6) | 4580 (34.2)  | 3627 (32.3)  |         |
| Yes                                                         | 13813 (63.7) | 5010 (60.4) | 8803 (65.8)  | 7605 (67.7)  |         |
| Missing                                                     | 1234         | 630         | 604          | 0            |         |
| Ever diagnosed with head injury requiring medical attention |              |             |              |              | 0.002   |
| No                                                          | 19729 (87.8) | 7711 (88.7) | 12018 (87.3) | 9764 (86.9)  |         |
| Yes                                                         | 2738 (12.2)  | 986 (11.3)  | 1752 (12.7)  | 1468 (13.1)  |         |
| Missing                                                     | 449          | 232         | 217          | 0            |         |
| Cumulative days of any pesticide use (days)                 |              |             |              |              | <0.0001 |
| Quartile 1: 0 to 64                                         | 6535 (28.5)  | 2812 (31.5) | 3723 (26.6)  | 2872 (25.6)  |         |
| Quartile 2: > 64 to 225                                     | 7181 (31.4)  | 2651 (29.7) | 4530 (32.4)  | 3728 (33.2)  |         |
| Quartile 3: > 225 to 457                                    | 4660 (20.4)  | 1704 (19.1) | 2956 (21.1)  | 2454 (21.8)  |         |
| Quartile 4: > 457                                           | 4514 (19.7)  | 1746 (19.6) | 2768 (19.8)  | 2178 (19.4)  |         |
| Missing                                                     | 26           | 16          | 10           | 0            |         |
| Change of sense of smell of taste during the past 12 months |              |             |              |              | 0.1083  |
| No                                                          | 20628 (93.3) | 7880 (92.9) | 12748 (93.5) | 10421 (93.8) |         |
| Yes                                                         | 1489 (6.7)   | 600 (7.1)   | 889 (6.5)    | 689 (6.2)    |         |
| Missing                                                     | 799          | 449         | 250          | 122          |         |
| Parkinson's disease                                         |              |             |              |              | <0.0001 |



|                                                                              |              |             |              |              |         |
|------------------------------------------------------------------------------|--------------|-------------|--------------|--------------|---------|
| No                                                                           | 22483 (98.7) | 8778 (99.2) | 13705 (98.3) | 11092 (99)   |         |
| Yes                                                                          | 307 (1.3)    | 72 (0.8)    | 235 (1.7)    | 115 (1)      |         |
| Missing                                                                      | 126          | 79          | 47           | 25           |         |
| Ever diagnosed with Diabetes (sugar) (other than while pregnant)             |              |             |              |              | <0.0001 |
| No                                                                           | 21583 (96.1) | 8219 (94.6) | 13364 (97.1) | 10962 (97.8) |         |
| Yes                                                                          | 876 (3.9)    | 470 (5.4)   | 406 (2.9)    | 247 (2.2)    |         |
| Missing                                                                      | 457          | 240         | 217          | 23           |         |
| Ever diagnosed with Heart disease                                            |              |             |              |              | <0.0001 |
| No                                                                           | 20004 (93.6) | 7418 (91.1) | 12586 (95.1) | 10680 (96.2) |         |
| Yes                                                                          | 1375 (6.4)   | 728 (8.9)   | 647 (4.9)    | 423 (3.8)    |         |
| Missing                                                                      | 1537         | 783         | 754          | 129          |         |
| Any HPEEs                                                                    |              |             |              |              | <0.0001 |
| No                                                                           | 19051 (85.8) | 7587 (88.3) | 11464 (84.2) | 9387 (83.6)  |         |
| Yes                                                                          | 3156 (14.2)  | 1003 (11.7) | 2153 (15.8)  | 1845 (16.4)  |         |
| Missing                                                                      | 709          | 339         | 370          | 0            |         |
| The decade highest exposure HPEE occurred                                    |              |             |              |              | <0.0001 |
| No HPEE                                                                      | 19051 (87)   | 7587 (89.4) | 11464 (85.6) | 9387 (84.9)  |         |
| 1990s                                                                        | 502 (2.3)    | 193 (2.3)   | 309 (2.3)    | 287 (2.6)    |         |
| 1980s                                                                        | 1126 (5.1)   | 344 (4.1)   | 782 (5.8)    | 694 (6.3)    |         |
| 1970s                                                                        | 788 (3.6)    | 225 (2.7)   | 563 (4.2)    | 497 (4.5)    |         |
| 1960s or before                                                              | 420 (1.9)    | 141 (1.7)   | 279 (2.1)    | 197 (1.8)    |         |
| Missing                                                                      | 1029         | 439         | 590          | 170          |         |
| Time delay between the highest exposure HPEE and washing with soap and water |              |             |              |              | <0.0001 |
| No HPEE                                                                      | 19051 (86.3) | 7587 (88.8) | 11464 (84.7) | 9387 (84)    |         |
| <30 min                                                                      | 1315 (6)     | 410 (4.8)   | 905 (6.7)    | 783 (7)      |         |
| 30-59                                                                        | 520 (2.4)    | 180 (2.1)   | 340 (2.5)    | 295 (2.6)    |         |
| 1-3 hours                                                                    | 624 (2.8)    | 199 (2.3)   | 425 (3.1)    | 357 (3.2)    |         |

|                                        |            |             |              |             |         |
|----------------------------------------|------------|-------------|--------------|-------------|---------|
| 4-6 hours                              | 370 (1.7)  | 104 (1.2)   | 266 (2)      | 234 (2.1)   |         |
| >6 hours                               | 200 (0.9)  | 65 (0.8)    | 135 (1)      | 115 (1)     |         |
| Missing                                | 836        | 384         | 452          | 61          |         |
| Exposure route (highest exposure HPEE) |            |             |              |             | <0.0001 |
| No HPEE                                | 19051 (86) | 7587 (88.6) | 11464 (84.4) | 9387 (83.8) |         |
| Respiratory or digestive tract         | 1152 (5.2) | 362 (4.2)   | 790 (5.8)    | 664 (5.9)   |         |
| Dermal only                            | 1943 (8.8) | 619 (7.2)   | 1324 (9.8)   | 1154 (10.3) |         |
| Missing                                | 770        | 361         | 409          | 27          |         |

---

<sup>a</sup>P-value for difference in characteristics between those who participated in 2013-2015 and those who did not

Table S3: Sensitivity analyses on HPEEs reported at enrollment (1993-1997) in relation to self-reported OI in 2013-2015 – adjusting for cumulative days of use of any pesticides and excluding Parkinson’s disease patients

|                                                             | Analysis 1 (n=11,232) |            |                   | Analysis 2 (n=11,117) |            |                   |
|-------------------------------------------------------------|-----------------------|------------|-------------------|-----------------------|------------|-------------------|
|                                                             | No OI, n (%)          | OI, n (%)  | OR (95% CI)       | No OI, n (%)          | OI, n (%)  | OR (95% CI)       |
| Any HPEEs                                                   |                       |            |                   |                       |            |                   |
| No                                                          | 8458 (84.2)           | 929 (78.3) | Ref               | 8422 (84.2)           | 866 (77.7) | Ref               |
| Yes                                                         | 1588 (15.8)           | 257 (21.7) | 1.42 (1.22, 1.66) | 1581 (15.8)           | 248 (22.3) | 1.46 (1.24, 1.7)  |
| Details about the highest HPEE                              |                       |            |                   |                       |            |                   |
| The decade it occurred                                      |                       |            |                   |                       |            |                   |
| No HPEE                                                     | 8458 (85.4)           | 929 (80.5) | Ref               | 8422 (85.4)           | 866 (80)   | Ref               |
| 1990s                                                       | 262 (2.6)             | 25 (2.2)   | 1.04 (0.68, 1.59) | 261 (2.6)             | 25 (2.3)   | 1.09 (0.72, 1.67) |
| 1980s                                                       | 598 (6)               | 96 (8.3)   | 1.61 (1.27, 2.03) | 597 (6.1)             | 95 (8.8)   | 1.67 (1.32, 2.11) |
| 1970s                                                       | 428 (4.3)             | 69 (6)     | 1.29 (0.99, 1.69) | 425 (4.3)             | 62 (5.7)   | 1.24 (0.93, 1.64) |
| 1960s or before                                             | 162 (1.6)             | 35 (3)     | 1.35 (0.92, 1.97) | 162 (1.6)             | 34 (3.1)   | 1.40 (0.95, 2.06) |
| Missing                                                     | 138                   | 32         |                   | 136                   | 32         |                   |
| Time delay between the HPEE and washing with soap and water |                       |            |                   |                       |            |                   |
| No HPEE                                                     | 8458 (84.7)           | 929 (78.7) | Ref               | 8422 (84.7)           | 866 (78.2) | Ref               |
| <30 min                                                     | 687 (6.9)             | 96 (8.1)   | 1.33 (1.06, 1.68) | 683 (6.9)             | 93 (8.4)   | 1.37 (1.09, 1.73) |
| 30-59                                                       | 256 (2.6)             | 39 (3.3)   | 1.32 (0.93, 1.88) | 254 (2.6)             | 35 (3.2)   | 1.26 (0.88, 1.82) |
| 1-3 hours                                                   | 308 (3.1)             | 49 (4.2)   | 1.33 (0.97, 1.82) | 307 (3.1)             | 49 (4.4)   | 1.42 (1.03, 1.94) |
| 4-6 hours                                                   | 188 (1.9)             | 46 (3.9)   | 1.96 (1.4, 2.74)  | 188 (1.9)             | 44 (4)     | 1.98 (1.4, 2.79)  |
| >6 hours                                                    | 94 (0.9)              | 21 (1.8)   | 1.81 (1.12, 2.94) | 94 (0.9)              | 21 (1.9)   | 1.9 (1.17, 3.08)  |
| Missing                                                     | 55                    | 6          |                   | 55                    | 6          |                   |
| Exposure route <sup>a</sup>                                 |                       |            |                   |                       |            |                   |
| No HPEE                                                     | 8458 (84.4)           | 929 (78.5) | Ref               | 8422 (84.4)           | 866 (77.9) | Ref               |
| Respiratory/ digestive tract                                | 564 (5.6)             | 100 (8.5)  | 1.46 (1.16, 1.83) | 561 (5.6)             | 98 (8.8)   | 1.52 (1.2, 1.91)  |
| Dermal only                                                 | 1000 (10)             | 154 (13)   | 1.41 (1.17, 1.71) | 996 (10)              | 147 (13.2) | 1.43 (1.18, 1.73) |
| Missing                                                     | 24                    | 3          |                   | 24                    | 3          |                   |

Abbreviations: HPEE: high pesticide exposure event; OI: olfactory impairment. All models included age, sex, state, education, marital status, smoking status, alcohol consumption, and head injury. Analysis 1 further adjusted for cumulative days of any pesticide use; analysis 2 adjusted for cumulative days of any pesticide use and excluded PD patients

<sup>a</sup> Participants with a history of HPEE were classified as having respiratory or gastrointestinal tract exposure if they reported that they breathed fumes or ingested or swallowed the pesticide during the HPEE event, regardless of whether they might also have had dermal exposure. Participants were classified as having only dermal exposure if they reported exposure of the head and/or face, arms, hands, cheek/back/abdomen, groin area, legs, or feet, but did not report breathing fumes or ingesting/swallowing the pesticide

Table S4: Sensitivity analyses on HPEEs reported at enrollment (1993-1997) in relation to self-reported OI in 2013-2015 – excluded farmers who reported taste or smell changes at enrollment and using inverse probability weights

|                                                             | Analysis 1 (n=10,421) |            |                   | Analysis 2   |            |                   | Mean (SD); (Min, Max) <sup>a</sup> |
|-------------------------------------------------------------|-----------------------|------------|-------------------|--------------|------------|-------------------|------------------------------------|
|                                                             | No OI, n (%)          | OI, n (%)  | OR (95% CI)       | No OI, n (%) | OI, n (%)  | OR (95% CI)       |                                    |
| Any HPEEs                                                   |                       |            |                   |              |            |                   |                                    |
| No                                                          | 7988 (84.9)           | 805 (79.5) | Ref               | 8458 (84.2)  | 929 (78.3) | Ref               | 1.00 (0.15);                       |
| Yes                                                         | 1421 (15.1)           | 207 (20.5) | 1.46 (1.24, 1.73) | 1588 (15.8)  | 257 (21.7) | 1.48 (1.27, 1.73) | (0.75, 1.93)                       |
| Details about the highest HPEE                              |                       |            |                   |              |            |                   |                                    |
| The decade it occurred                                      |                       |            |                   |              |            |                   |                                    |
| No HPEE                                                     | 7988 (86)             | 805 (81.5) | Ref               | 8458 (85.4)  | 929 (80.5) | Ref               | 1.01 (0.22);                       |
| 1990s                                                       | 240 (2.6)             | 21 (2.1)   | 1.07 (0.68, 1.69) | 262 (2.6)    | 25 (2.2)   | 1.16 (0.74, 1.82) | (0.71, 15.52)                      |
| 1980s                                                       | 541 (5.8)             | 77 (7.8)   | 1.60 (1.24, 2.07) | 598 (6)      | 96 (8.3)   | 1.64 (1.30, 2.07) |                                    |
| 1970s                                                       | 374 (4)               | 56 (5.7)   | 1.37 (1.02, 1.84) | 428 (4.3)    | 69 (6)     | 1.34 (1.03, 1.75) |                                    |
| 1960s or before                                             | 145 (1.6)             | 29 (2.9)   | 1.43 (0.95, 2.16) | 162 (1.6)    | 35 (3)     | 1.34 (0.91, 1.99) |                                    |
| Missing                                                     | 121                   | 24         |                   | 138          | 32         |                   |                                    |
| Time delay between the HPEE and washing with soap and water |                       |            |                   |              |            |                   |                                    |
| No HPEE                                                     | 7988 (85.4)           | 805 (79.9) | Ref               | 8458 (84.7)  | 929 (78.7) | Ref               | 1.01 (0.16);                       |
| <30 min                                                     | 612 (6.5)             | 82 (8.1)   | 1.47 (1.15, 1.88) | 687 (6.9)    | 96 (8.1)   | 1.40 (1.11, 1.77) | (0.71, 3.65)                       |
| 30-59                                                       | 226 (2.4)             | 29 (2.9)   | 1.27 (0.85, 1.89) | 256 (2.6)    | 39 (3.3)   | 1.31 (0.93, 1.85) |                                    |
| 1-3 hours                                                   | 280 (3)               | 37 (3.7)   | 1.23 (0.86, 1.75) | 308 (3.1)    | 49 (4.2)   | 1.40 (1.01, 1.92) |                                    |
| 4-6 hours                                                   | 166 (1.8)             | 36 (3.6)   | 1.98 (1.36, 2.87) | 188 (1.9)    | 46 (3.9)   | 2.10 (1.50, 2.95) |                                    |
| >6 hours                                                    | 86 (0.9)              | 18 (1.8)   | 1.96 (1.17, 3.3)  | 94 (0.9)     | 21 (1.8)   | 1.75 (1.06, 2.88) |                                    |
| Missing                                                     | 51                    | 5          |                   | 55           | 6          |                   |                                    |
| Exposure route <sup>b</sup>                                 |                       |            |                   |              |            |                   |                                    |
| No HPEE                                                     | 7988 (85.1)           | 805 (79.8) | Ref               | 8458 (84.4)  | 929 (78.5) | Ref               | 1.00 (0.15);                       |
| Respiratory/<br>digestive tract                             | 492 (5.2)             | 70 (6.9)   | 1.34 (1.03, 1.75) | 564 (5.6)    | 100 (8.5)  | 1.52 (1.21, 1.91) | (0.76, 1.94)                       |
| Dermal only                                                 | 906 (9.7)             | 134 (13.3) | 1.54 (1.26, 1.88) | 1000 (10)    | 154 (13)   | 1.47 (1.22, 1.78) |                                    |
| Missing                                                     | 23                    | 3          |                   | 24           | 3          |                   |                                    |

Abbreviations: HPEE: high pesticide exposure event; OI: olfactory impairment. All models included age, sex, state, education, marital status, smoking status, alcohol consumption, and head injury. Analyses 1 excluded farmers who reported taste or smell changes at enrollment; and analyses 2 used inverse probability weighting to account for potential loss to follow-up

<sup>a</sup>Distribution of inverse probability weights

<sup>b</sup> Participants with a history of HPEE were classified as having respiratory or gastrointestinal tract exposure if they reported that they breathed fumes or ingested or swallowed the pesticide during the HPEE event, regardless of whether they might also have had dermal exposure. Participants were classified as having only dermal exposure if they reported exposure of the head and/or face, arms, hands, cheek/back/abdomen, groin area, legs, or feet, but did not report breathing fumes or ingesting/swallowing the pesticide

Table S5: Adjusted odds ratios (95% CI) for self-reported olfactory impairment (OI) in 2013–2015 in association with highest exposure high pesticide exposure event (HPEE) at enrollment (1993–1997) defined by time delay between the HPEE and washing with soap and water, stratified by exposure route, relative to OI in farmers without any history of HPEE at enrollment

| Respiratory or digestive tract <sup>c</sup>  | No OI, n (%) | OI, n (%)  | OR (95% CI)       |
|----------------------------------------------|--------------|------------|-------------------|
| No HPEE                                      | 8458 (94.1)  | 929 (90.5) | Ref               |
| <30 min                                      | 159 (1.8)    | 30 (2.9)   | 1.82 (1.21, 2.72) |
| 30-59                                        | 86 (1)       | 14 (1.4)   | 1.35 (0.76, 2.40) |
| 1-3 hours                                    | 140 (1.6)    | 20 (1.9)   | 1.16 (0.72, 1.87) |
| 4-6 hours                                    | 83 (0.9)     | 21 (2)     | 2.07 (1.26, 3.39) |
| > 6 hours                                    | 62 (0.7)     | 13 (1.3)   | 1.79 (0.98, 3.30) |
| Missing <sup>b</sup>                         | 34           | 2          |                   |
| Dermal only <sup>c</sup>                     |              |            |                   |
| No HPEE                                      | 8458 (89.5)  | 929 (85.9) | Ref               |
| <30 min                                      | 522 (5.5)    | 65 (6)     | 1.26 (0.96, 1.65) |
| 30-59                                        | 169 (1.8)    | 25 (2.3)   | 1.42 (0.93, 2.18) |
| 1-3 hours                                    | 167 (1.8)    | 29 (2.7)   | 1.58 (1.05, 2.37) |
| 4-6 hours                                    | 104 (1.1)    | 25 (2.3)   | 2.09 (1.34, 3.27) |
| > 6 hours                                    | 32 (0.3)     | 8 (0.7)    | 2.12 (0.96, 4.66) |
| Missing <sup>b</sup>                         | 6            | 2          |                   |
| Missing information on exposure <sup>b</sup> |              |            | 27                |

Abbreviations: HPEE: high pesticide exposure event; OI: olfactory impairment; OR: odds ratio; CI: confidence interval

<sup>a</sup> Adjusted for age (continuous variable), sex, state, education, marital status, smoking status, alcohol consumption, and head injury

<sup>b</sup> Numbers with missing data among those who reported an HPEE

<sup>c</sup> Participants with a history of HPEE were classified as having respiratory or gastrointestinal tract exposure if they reported that they breathed fumes or ingested or swallowed the pesticide during the HPEE event, regardless of whether they might also have had dermal exposure. Participants were classified as having only dermal exposure if they reported exposure of the head and/or face, arms, hands, cheek/back/abdomen, groin area, legs, or feet, but did not report breathing fumes or ingesting/swallowing the pesticide
