# Supplementary material
Source: PubMed Central journal article supplement (PMC6378679)
Supplement: ehp3713.smcontents.508.pdf [file ehp3713.smcontents.508.pdf]

**Note to readers with disabilities:** *EHP* strives to ensure that all journal content is accessible to all readers. However, some figures and Supplemental Material published in *EHP* articles may not conform to [508 standards](#) due to the complexity of the information being presented. If you need assistance accessing journal content, please contact [ehp508@niehs.nih.gov](mailto:ehp508@niehs.nih.gov). Our staff will work with you to assess and meet your accessibility needs within 3 working days.

### **Supplemental Material**

#### **High Pesticide Exposure Events and Olfactory Impairment among U.S. Farmers**

Srishti Shrestha, Freya Kamel, David M. Umbach, Laura E. Beane Freeman, Stella Koutros, Michael Alavanja, Aaron Blair, Dale P. Sandler, and Honglei Chen

#### **Table of Contents**

**Supplemental methods:** Details on inverse probability weighting.

**Figure S1.** Sample selection for analysis of HPEE in relation to Olfactory impairment.

**Table S1.** AHS survey questions on high pesticide exposure events and olfactory impairment.

**Table S2.** Characteristics of full cohort taking take-home questionnaire, those who participated in the third follow-up (2013-2015), and those who did not participate in the third follow-up (2013-2015).

**Table S3.** Sensitivity analyses on HPEEs reported at enrollment (1993-1997) in relation to self-reported OI in 2013-2015 – adjusting for cumulative days of use of any pesticides and excluding Parkinson’s disease patients.

**Table S4.** Sensitivity analyses on HPEEs reported at enrollment (1993-1997) in relation to self-reported OI in 2013-2015 – excluded farmers who reported taste or smell changes at enrollment and using inverse probability weights.

**Table S5.** Adjusted odds ratios (95% CI) for self-reported olfactory impairment (OI) in 2013–2015 in association with highest exposure high pesticide exposure event (HPEE) at enrollment (1993–1997) defined by time delay between the HPEE and washing with soap and water, stratified by exposure route, relative to OI in farmers without any history of HPEE at enrollment.
